# Supplementary material for: Population Genomic Analysis Reveals Highly Conserved Mitochondrial Genomes in the Yeast Species Lachancea thermotolerans
Source: PubMed Central journal article supplement (PMC4224330; doi:10.1093/gbe/evu203), 2014-09-11
Supplement: supp_evu203_SuppInfo.pdf [file supp_evu203_SuppInfo.pdf]

**Figure S1.**

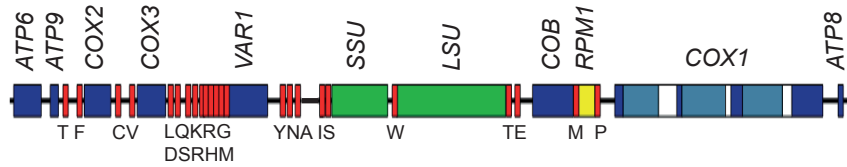

**Mitochondrial genome map of *L. thermotolerans*.**

The 35 genes encoded are found in both the *L. kluveri* and by *L. thermotolerans* genomes. The protein-coding (dark blue), tRNA (red) and rRNA (green) genes are represented in addition to *RPM1* (yellow) and the coding (light blue) and noncoding introns (white). There is at least one tRNA for each amino acid, which is indicated by the single letter code below the figure. The intergenic regions of *L. thermotolerans* are small and compact (24.2%) in comparison to those in *L. kluveri* (41%).

**Figure S2.**

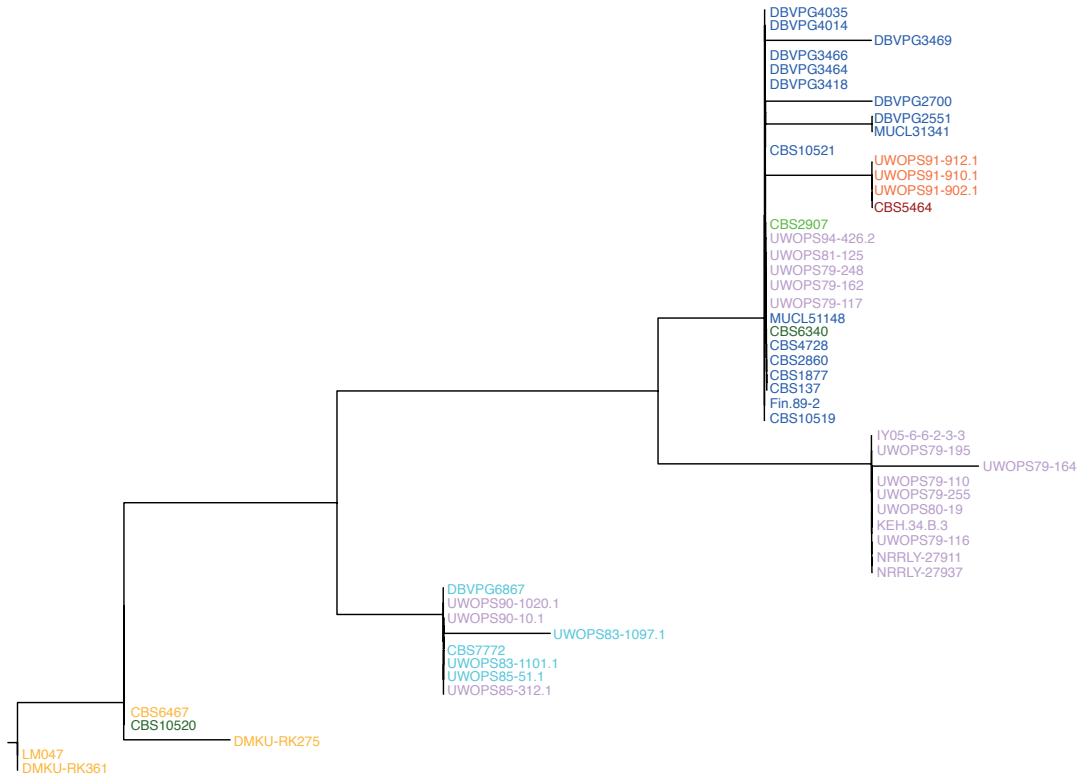

Phylogenetic tree constructed with PhyML using the *VAR1* gene, using a total of 1,125 bp. The phylogeny generally reflects the same clustering found with the concatenated gene set from all coding mt genes.

**Table S1.** List of the *L. thermotolerans* isolates used in this study.

| Strain          | Geographical Origin              | Ecological Origin                    |
|-----------------|----------------------------------|--------------------------------------|
| CBS10519        | Ukraine                          | exsudate of <i>Quercus sp.</i>       |
| CBS10520        | Russia                           | exsudate of <i>Quercus mongolica</i> |
| CBS10521        | Finland                          | exsudate of <i>Quercus sp.</i>       |
| CBS137          | Netherlands                      | date                                 |
| CBS1877         | Italy                            | grape                                |
| CBS2860         | Sardinia                         | grape must                           |
| CBS2907         | South Africa                     | soil                                 |
| CBS4728         | Czechoslovakia                   | grape                                |
| CBS5464         | Australia                        | cotton seed                          |
| CBS6340T        | Russia                           | mirabelle-plum conserve              |
| CBS6467         | Japan                            | Tree exudate                         |
| CBS7772         | Brazil                           | <i>Uca sp.</i> (fiddler crab)        |
| MUCL31341       | Italy                            | wine                                 |
| UWOPS 79-110    | Ontario, CA                      | Black knot, <i>Prunus virginiana</i> |
| UWOPS 79-116    | Pinery, CA                       | Black knot, <i>Prunus virginiana</i> |
| UWOPS 79-117    | Pinery, Ontario, CA              | Black knot, <i>Prunus virginiana</i> |
| UWOPS 79-162    | Melbourne, Ontario, CA           | Black knot, <i>Quercus rubra</i>     |
| UWOPS 79-164    | Melbourne, Ontario, CA           | Black knot, <i>Prunus virginiana</i> |
| UWOPS 79-195    | Melbourne, Ontario, CA           | Black knot, <i>Prunus virginiana</i> |
| UWOPS 79-248    | Ontario, CA                      | Frass, Birch                         |
| UWOPS 79-255    | Ontario, CA                      | Black knot, <i>Prunus pumila</i>     |
| UWOPS 80-19     | Ontario, CA                      | Black knot, <i>Prunus virginiana</i> |
| UWOPS 81-125    | Melbourne, Ontario, CA           | Gall, <i>Quercus sp</i>              |
| UWOPS 83-1097.1 | Cayman Brac, Cayman Is           | <i>Gitona americana</i>              |
| UWOPS 83-1101.1 | Cayman Brac, Cayman Is           | <i>Gitona americana</i>              |
| UWOPS 85-51.1   | Big Pine Key, Florida, USA       | <i>Opuntia cubensis</i>              |
| UWOPS 85-312.1  | Tucson, Arizona, USA             | <i>Drosophila carbonaria</i>         |
| UWOPS 90-10.1   | Shroud Cay, Exumas Cays, Bahamas | Columnar cactus fruit                |
| UWOPS 90-1020.1 | Shroud Cay, Exumas Cays, Bahamas | coco plum                            |
| UWOPS 91-902.1  | Saddle Rd Park Hawaii Is, USA    | flux (white), <i>Myoporum</i>        |
| UWOPS 91-910.1  | Saddle Rd Park Hawaii Is, USA    | flux (pink), <i>Myoporum</i>         |
| UWOPS 91-912.1  | Saddle Rd Park Hawaii Is, USA    | flux (white), <i>Myoporum</i>        |
| UWOPS 94-426.2  | Tequila, Jalisco, MX             | distillery, agave must               |

|                 |                                     |                                                |
|-----------------|-------------------------------------|------------------------------------------------|
| KEH.34.B.3      | Ste. Genevieve, Missouri, USA       | chaumette vineyard fermentation                |
| DMKU-RK275      | Thailand                            | rice leaves                                    |
| DMKU-RK361      | Nong Muang, Thailand                | sugarcane leaves                               |
| LM047           | Khoa ito waterfall, Thailand        | leaves                                         |
| NRRL Y-27937    | Los Angeles, USA                    | surface of male <i>Chauliodes rastricornis</i> |
| NRRL Y-27911    | Los Angeles, USA                    | gut of male <i>Chauliodes rastricornis</i>     |
| IY 05-6-6-2-3-3 | Los Angeles, USA                    | gut of female <i>Chauliodes rastricornis</i>   |
| DBVPG 2551      | Piemonte, Italy                     | barbera wine                                   |
| DBVPG 2700      | Campo de Santiago, La Mancha, Spain | airen grapes                                   |
| DBVPG 3418      | Italy                               | milk                                           |
| DBVPG 3464      | Valdepenas, La Mancha, Spain        | grapes                                         |
| DBVPG 3466      | La Encomienda, La Mancha, Spain     | grapes                                         |
| DBVPG 3469      | Manzanares, La Mancha, Spain        | grapes                                         |
| DBVPG 4014      | Italy                               | caverns                                        |
| DBVPG 4035      | ex Yugoslavia                       | grape must                                     |
| DBVPG 6867      | Brazil                              | <i>Pilosocereus arrabidae</i>                  |
| Fin. 89-2       | Finland                             | exudate of <i>Quercus</i> sp.                  |

**Table S2.** List of the 50 genes from the nuclear genomes used in the construction of the phylogenetic trees for *L. thermotolerans* and *L. kluyveri*. The positions of all genes in the concatenated alignment are indicated.

| <i>L. thermotolerans</i><br>genes | Position in the<br>alignment* | Orthologous gene in <i>L.</i><br><i>kluyveri</i> | Position in the alignment<br>** |
|-----------------------------------|-------------------------------|--------------------------------------------------|---------------------------------|
| KLTH0C11550g                      | 1 to 1197                     | SAKL0E00814g                                     | 1 to 1197                       |
| KLTH0B01386g                      | 1198 to 1971                  | SAKL0G14652g                                     | 1198 to 1983                    |
| KLTH0G00814g                      | 1972 to 2859                  | SAKL0F00924g                                     | 1984 to 2871                    |
| KLTH0F05390g                      | 2860 to 3957                  | SAKL0C06050g                                     | 2872 to 4092                    |
| KLTH0F18898g                      | 3958 to 4373                  | SAKL0C12804g                                     | 4093 to 4509                    |
| KLTH0B04334g                      | 4374 to 5282                  | SAKL0B12034g                                     | 4510 to 5430                    |
| KLTH0E12232g                      | 5283 to 7730                  | SAKL0H10274g                                     | 5431 to 8085                    |
| KLTH0C03146g                      | 7731 to 9236                  | SAKL0D12056g                                     | 8086 to 9567                    |
| KLTH0D08822g                      | 9237 to 10037                 | SAKL0B11440g                                     | 9568 to 10302                   |
| KLTH0D08756g                      | 10038 to 10601                | SAKL0B11374g                                     | 10303 to 10896                  |
| KLTH0G05280g                      | 10602 to 10874                | SAKL0G06468g                                     | 10897 to 11193                  |
| KLTH0E15752g                      | 10875 to 11702                | SAKL0C08118g                                     | 11194 to 12051                  |
| KLTH0F10912g                      | 11703 to 12287                | SAKL0B09108g                                     | 12052 to 12642                  |
| KLTH0F14278g                      | 12288 to 13949                | SAKL0F03498g                                     | 12643 to 14241                  |
| KLTH0D06512g                      | 13950 to 14177                | SAKL0A09174g                                     | 14242 to 14469                  |
| KLTH0C09636g                      | 14178 to 15986                | SAKL0C09592g                                     | 14470 to 16338                  |
| KLTH0E08030g                      | 15987 to 16847                | SAKL0H22264g                                     | 16339 to 17202                  |
| KLTH0C04554g                      | 16848 to 21128                | SAKL0D02222g                                     | 17203 to 21480                  |
| KLTH0E09922g                      | 21129 to 24488                | SAKL0H12958g                                     | 21481 to 24870                  |
| KLTH0G05368g                      | 24489 to 25817                | SAKL0G06556g                                     | 24871 to 26202                  |
| KLTH0G12474g                      | 25818 to 26507                | SAKL0H15752g                                     | 26203 to 26889                  |
| KLTH0G14586g                      | 26508 to 27458                | SAKL0H18084g                                     | 26890 to 27861                  |
| KLTH0F03102g                      | 27459 to 28697                | SAKL0C03454g                                     | 27862 to 29100                  |
| KLTH0E02420g                      | 28698 to 30902                | SAKL0G07326g                                     | 29101 to 31314                  |
| KLTH0G03872g                      | 30903 to 31133                | SAKL0G05038g                                     | 31315 to 31545                  |
| KLTH0B08030g                      | 31134 to 31550                | SAKL0E13904g                                     | 31546 to 32016                  |
| KLTH0G09856g                      | 31551 to 33623                | SAKL0E08250g                                     | 32017 to 34080                  |
| KLTH0F01540g                      | 33624 to 35381                | SAKL0C01606g                                     | 34081 to 35931                  |
| KLTH0G02640g                      | 35382 to 36710                | SAKL0G03806g                                     | 35932 to 37275                  |
| KLTH0G09108g                      | 36711 to 39059                | SAKL0E08998g                                     | 37276 to 39747                  |
| KLTH0E01980g                      | 39060 to 39818                | SAKL0F14432g                                     | 39748 to 40506                  |
| KLTH0E02904g                      | 39819 to 40616                | SAKL0G07810g                                     | 40507 to 41322                  |
| KLTH0G18326g                      | 40617 to 41426                | SAKL0B01518g                                     | 41323 to 42120                  |
| KLTH0H06754g                      | 41427 to 42335                | SAKL0A07282g                                     | 42121 to 42897                  |
| KLTH0D06446g                      | 42336 to 43085                | SAKL0A09020g                                     | 42898 to 43641                  |
| KLTH0H14256g                      | 43086 to 46880                | SAKL0D11132g                                     | 43642 to 47781                  |
| KLTH0G03102g                      | 46881 to 47165                | SAKL0G04224g                                     | 47782 to 48066                  |

|              |                |              |                |
|--------------|----------------|--------------|----------------|
| KLTH0G03036g | 47166 to 48464 | SAKL0G04158g | 48067 to 49359 |
| KLTH0C10054g | 48465 to 49373 | SAKL0C09966g | 49360 to 50493 |
| KLTH0F19030g | 49374 to 50327 | SAKL0C12958g | 50494 to 51594 |
| KLTH0F19272g | 50328 to 51762 | SAKL0C13244g | 51595 to 52803 |
| KLTH0C02002g | 51763 to 52569 | SAKL0G15202g | 52804 to 53616 |
| KLTH0H00880g | 52570 to 53826 | SAKL0H02464g | 53617 to 54867 |
| KLTH0E07590g | 53827 to 54579 | SAKL0H21692g | 54868 to 55650 |
| KLTH0E03652g | 54580 to 57024 | SAKL0G08250g | 55651 to 58146 |
| KLTH0E12936g | 57025 to 58659 | SAKL0H09658g | 58147 to 59679 |
| KLTH0B05280g | 58660 to 61620 | SAKL0E11044g | 59680 to 62745 |
| KLTH0E10978g | 61621 to 64935 | SAKL0H11880g | 62746 to 66375 |
| KLTH0F10758g | 64936 to 65805 | SAKL0B09240g | 66376 to 66900 |
| KLTH0H09504g | 65806 to 66358 | SAKL0H24112g | 66901 to 67456 |

\* the sequence alignment is provided as a supplementary file (concatAliLath.fasta)

\*\* the sequence alignment is provided as a supplementary file (concatAliLakl.fasta)

**Table S3.** The number of single nucleotide polymorphisms (SNPs) and indels found in different regions of the *L. thermotolerans* genomes used in this study.

| Strain               | SNPs    |        |               |           |         | Indels  |        |               |           |         |
|----------------------|---------|--------|---------------|-----------|---------|---------|--------|---------------|-----------|---------|
|                      | total # | in CDS | in intergenic | in intron | in rRNA | total # | in CDS | in intergenic | in intron | in rRNA |
| CBS10519             | 50      | 2      | 27            | 13        | 7       | 3       | 0      | 2             | 1         | 0       |
| CBS10520             | 279     | 15     | 154           | 72        | 38      | 4       | 0      | 4             | 0         | 0       |
| CBS10521             | 49      | 3      | 27            | 15        | 4       | 0       | 0      | 0             | 0         | 0       |
| CBS137               | 1       | 0      | 1             | 0         | 0       | 0       | 0      | 0             | 0         | 0       |
| CBS1877              | 2       | 0      | 1             | 1         | 0       | 11      | 0      | 8             | 1         | 2       |
| CBS2860              | 20      | 0      | 14            | 4         | 2       | 1       | 0      | 1             | 0         | 0       |
| CBS4728              | 54      | 1      | 34            | 13        | 6       | 5       | 0      | 3             | 1         | 1       |
| CBS5464              | 56      | 2      | 31            | 16        | 7       | 1       | 0      | 1             | 0         | 0       |
| CBS6340 <sup>T</sup> | 2       | 0      | 1             | 0         | 1       | 0       | 0      | 0             | 0         | 0       |
| CBS6467              | 280     | 13     | 152           | 76        | 39      | 8       | 0      | 8             | 0         | 0       |
| CBS7772              | 275     | 12     | 120           | 106       | 36      | 2       | 0      | 1             | 1         | 0       |
| MUCL3134<br>1        | 46      | 3      | 25            | 16        | 2       | 0       | 0      | 0             | 0         | 0       |
| UWOPS_79<br>-110     | 211     | 8      | 88            | 92        | 23      | 3       | 0      | 2             | 1         | 0       |
| UWOPS_79<br>-117     | 47      | 1      | 28            | 14        | 4       | 4       | 0      | 3             | 1         | 0       |
| UWOPS_79<br>-162     | 48      | 1      | 30            | 13        | 4       | 3       | 0      | 2             | 1         | 0       |
| UWOPS_79<br>-248     | 50      | 1      | 31            | 14        | 4       | 4       | 0      | 4             | 0         | 0       |
| UWOPS_79<br>-255     | 215     | 8      | 90            | 94        | 23      | 1       | 0      | 1             | 0         | 0       |
| UWOPS_80<br>-19      | 208     | 8      | 82            | 94        | 24      | 3       | 0      | 3             | 0         | 0       |
| UWOPS_81<br>-125     | 44      | 1      | 26            | 13        | 4       | 7       | 0      | 6             | 1         | 0       |
| UWOPS_83<br>-1097.1  | 259     | 13     | 118           | 97        | 31      | 6       | 0      | 4             | 1         | 1       |
| UWOPS_83<br>-1101.1  | 259     | 12     | 114           | 102       | 31      | 13      | 0      | 13            | 0         | 0       |
| UWOPS_85<br>-51.1    | 287     | 12     | 130           | 107       | 37      | 2       | 0      | 0             | 2         | 0       |
| UWOPS_85<br>-312.1   | 292     | 14     | 123           | 114       | 40      | 1       | 0      | 1             | 0         | 0       |
| UWOPS_94<br>-426.2   | 21      | 0      | 15            | 4         | 2       | 1       | 0      | 1             | 0         | 0       |

|                 |     |    |     |     |    |    |   |    |   |   |
|-----------------|-----|----|-----|-----|----|----|---|----|---|---|
| KEH.34.B.3      | 204 | 8  | 84  | 89  | 23 | 7  | 0 | 7  | 0 | 0 |
| DMKU-RK275      | 273 | 15 | 143 | 72  | 43 | 10 | 0 | 10 | 0 | 0 |
| DMKU-RK361      | 286 | 15 | 158 | 75  | 38 | 6  | 0 | 6  | 0 | 0 |
| LM047           | 267 | 15 | 148 | 71  | 33 | 11 | 0 | 10 | 0 | 1 |
| NRRL_Y-27937    | 192 | 9  | 74  | 85  | 24 | 6  | 0 | 6  | 0 | 0 |
| NRRL_Y-27911    | 191 | 8  | 74  | 86  | 23 | 3  | 0 | 3  | 0 | 0 |
| CBS2907         | 50  | 1  | 30  | 16  | 3  | 1  | 0 | 1  | 0 | 0 |
| UWOPS_79-116    | 223 | 8  | 93  | 98  | 24 | 0  | 0 | 0  | 0 | 0 |
| UWOPS_79-164    | 215 | 9  | 89  | 94  | 23 | 0  | 0 | 0  | 0 | 0 |
| UWOPS_79-195    | 212 | 8  | 88  | 93  | 23 | 3  | 0 | 3  | 0 | 0 |
| UWOPS_90-10.1   | 287 | 13 | 125 | 110 | 39 | 0  | 0 | 0  | 0 | 0 |
| UWOPS_90-1020.1 | 284 | 13 | 125 | 106 | 40 | 1  | 0 | 1  | 0 | 0 |
| UWOPS_91-902.1  | 58  | 2  | 34  | 15  | 7  | 2  | 0 | 2  | 0 | 0 |
| UWOPS_91-910.1  | 59  | 2  | 35  | 15  | 7  | 0  | 0 | 0  | 0 | 0 |
| UWOPS_91-912.1  | 61  | 2  | 36  | 16  | 7  | 0  | 0 | 0  | 0 | 0 |
| IY_05-6-6-2-3-3 | 206 | 8  | 70  | 102 | 26 | 7  | 0 | 7  | 0 | 0 |
| DBVPG_2551      | 49  | 3  | 28  | 16  | 2  | 2  | 0 | 2  | 0 | 0 |
| DBVPG_2700      | 83  | 10 | 45  | 20  | 8  | 16 | 0 | 11 | 0 | 5 |
| DBVPG_3418      | 2   | 0  | 1   | 1   | 0  | 0  | 0 | 0  | 0 | 0 |
| DBVPG_3464      | 5   | 0  | 4   | 1   | 0  | 0  | 0 | 0  | 0 | 0 |
| DBVPG_3466      | 3   | 0  | 2   | 1   | 0  | 12 | 0 | 9  | 0 | 2 |
| DBVPG_3469      | 46  | 3  | 22  | 15  | 6  | 30 | 0 | 21 | 2 | 7 |
| DBVPG_4014      | 5   | 1  | 3   | 1   | 0  | 1  | 0 | 1  | 0 | 0 |
| DBVPG_4035      | 24  | 0  | 19  | 3   | 2  | 1  | 0 | 1  | 0 | 0 |
| DBVPG_6867      | 269 | 12 | 114 | 105 | 37 | 9  | 0 | 8  | 1 | 0 |
| Fin.89-2        | 49  | 3  | 27  | 15  | 4  | 1  | 0 | 1  | 0 | 0 |
